# Supplementary material
Source: publisher figshare collection journal article supplement (https://sage.figshare.com/ndownloader/files/40903446)
Supplement: Supplementary file 1 [file 40903446]

Table 1. *Descriptive Statistics*

|  | *N* | % | *M* | SD |
| --- | --- | --- | --- | --- |
| Gender Identity |  |  |  |  |
| Men | 660 | 30.6% |  |  |
| Women | 1392 | 64.0% |  |  |
| Gender Minority | 108 | 5.0% |  |  |
| Transmale/transman/FTM | 9 |  |  |  |
| Transwoman | 1 |  |  |  |
| Genderqueer | 18 |  |  |  |
| Gender non-conforming | 10 |  |  |  |
| Non-binary | 54 |  |  |  |
| Androgynous | 10 |  |  |  |
| Not listed | 6 |  |  |  |
| Race/Ethnicity |  |  |  |  |
| White | 910 | 42.1% |  |  |
| Black | 433 | 20.0% |  |  |
| Asian | 507 | 23.5% |  |  |
| Latine | 346 | 16.0% |  |  |
| Multiracial | 92 | 4.3% |  |  |
| Other Race | 110 | 5.1% |  |  |
| Native American/American  Indian/Alaska Native/Indigenous | 33 |  |  |  |
| Middle Eastern/North African  (Non-White) | 54 |  |  |  |
| Pacific Islander/Native Hawaiian | 11 |  |  |  |
| Other or not listed | 12 |  |  |  |
| Sexual Orientation |  |  |  |  |
| Straight/Heterosexual | 1467 | 67.9% |  |  |
| Sexual minority | 693 | 32.1% |  |  |
| Lesbian | 66 |  |  |  |
| Gay | 49 |  |  |  |
| Bisexual | 320 |  |  |  |
| Queer | 53 |  |  |  |
| Two spirit | 1 |  |  |  |
| Questioning | 76 |  |  |  |
| Pansexual | 79 |  |  |  |
| Asexual | 36 |  |  |  |
| Not listed | 13 |  |  |  |
| University |  |  |  |  |
| 1 | 1023 | 47.4% |  |  |
| 2 | 1137 | 52.6% |  |  |
| First Generation College Student | 717 | 33.5%* |  |  |
| Age |  |  | 20.09 | 1.58 |
| Suicidality |  |  | 6.11 | 3.54 |
| Endorsed any lifetime suicidality | 1274 | 63.5%* |  |  |
| Current urge to harm self** |  |  | 2.68 | 4.56 |
| Endorsed any current intent to harm  self | 201 | 12.0% |  |  |
| Current intent to suicide** |  |  | 1.09 | 0.48 |
| Endorsed any current intent to suicide | 84 | 5.0%* |  |  |
| Average drinks per week |  |  | 3.65 | 6.34 |
| Endorsed any drinks | 1126 | 52.1% |  |  |
| Sexual assault history severity |  |  | 14.03 | 20.87 |
| Endorsed any sexual assault history | 1025 | 47.5% |  |  |
| Posttraumatic stress symptoms |  |  | 11.59 | 9.28 |
| Endorsed any posttraumatic stress  symptoms | 1772 | 15.5%* |  |  |

Note: *Missing data so percentage was from valid percent. **Current urge to harm self and current intent to suicide were only asked among those who scored 3 or higher on lifetime suicidality (SBQ-R), which included 1,429 participants. Therefore, the percentages are based on 1,429 participants for these measures.
